# Supplementary material for: T cells in chronic lymphocytic leukemia display dysregulated expression of immune checkpoints and activation markers
Source: PubMed Central journal article supplement — Haematologica. 2016 Dec 2;102(3):562–72. doi: 10.3324/haematol.2016.151100 (PMC5394965; doi:10.3324/haematol.2016.151100), 2017-03
Supplement: 2016.151100.PALMA_SUPPL.pdf [file 2016.151100.PALMA_SUPPL.pdf]

## T cells in chronic lymphocytic leukemia display dysregulated expression of immune checkpoints and activation markers

Marzia Palma,<sup>1,2</sup> Giusy Gentilcore,<sup>1</sup> Kia Heimersson,<sup>1</sup> Fariba Mozaffari,<sup>1</sup> Barbro Näsman-Glaser,<sup>1</sup> Emma Young,<sup>3</sup> Richard Rosenquist,<sup>3</sup> Lotta Hansson,<sup>1,2</sup> Anders Österborg<sup>1,2</sup> and Håkan Mellstedt<sup>1</sup>

*AÖ and HM contributed equally to this work*

<sup>1</sup>Immune and Gene Therapy Laboratory, Department of Oncology & Pathology, Cancer Centre Karolinska, Karolinska Institutet, Stockholm; <sup>2</sup>Department of Hematology, Karolinska University Hospital, Stockholm and <sup>3</sup>Department of Immunology, Genetics and Pathology, Science for Life Laboratory, Uppsala University, Sweden

©2017 Ferrata Storti Foundation. This is an open-access paper. doi:10.3324/haematol.2016.151100

Received: June 14, 2016.

Accepted: November 17, 2016.

Pre-published: December 7, 2016.

Correspondence: marzia.palma@karolinska.se

---

### Methods and Materials

#### *Flow cytometric analysis of PBMC*

For intracellular staining, cells were washed in CSB, incubated for 30 min at 4°C with Fix/Perm (1:4) solution, washed with Perm/Buffer solution (1:10) and incubated with the anti-CTLA-4 or isotype control for 25 min at RT. Excess of antibodies was removed by washing twice with Perm/Buffer. The cells were then resuspended in 500 µl CSB and analyzed by flow cytometry using a FACSCanto II flow cytometer (BD-Biosciences) and analyzed by FACSDiva version 6.1.3 (BD Biosciences) or FlowJo version 8.8.2 (TreeStar) softwares. The frequency of unstimulated cells was subtracted from those of cultured cells.

To assess Ki-67 expression, freshly isolated CLL cells were fixed with 1.6% paraformaldehyde and permeabilized with 80% methanol. The cells ( $4 \times 10^6$ ) were then stained with AF647-anti-Ki-67 or isotype control (Bio-Legend).

#### *Statistical Analyses*

Comparisons of marker expression between different groups of patients were done either with the unpaired T-test or the non-parametric Mann-Whitney U test depending on data distribution. Simple regression analyses and the Spearman rank test were used to estimate the relationship between the expression levels of the different markers and white blood cell (WBC) counts.

**Supplementary Figure 1. Effect of PHA stimulation on T-cell surface expression of immune checkpoints and activation markers.** PBMCs from CLL patients and controls were cultured for 72 hours in medium in the absence or in the presence of PHA. The horizontal axis represents the time of PHA stimulation expressed in hours. Color lines represent median values from 8 healthy controls (green), 9 non-progressive (blue) and 8 progressive (red) CLL patients in the absence (dashed line) or presence (unbroken line) of PHA in the culture medium. **(A)** PD-1 expression in CD4<sup>+</sup> (i) and CD8<sup>+</sup> (ii) cells. **(B)** CTLA-4 expression in CD4<sup>+</sup> (i) and CD8<sup>+</sup> (ii) cells. **(C)** CD69 expression in CD4<sup>+</sup> (i) and CD8<sup>+</sup> (ii) cells. **(D)** CD137 expression in CD4<sup>+</sup> (i) and CD8<sup>+</sup> (ii) cells. **(E)** CD103 expression in CD4<sup>+</sup> (i) and CD8<sup>+</sup> (ii) cells. Standard deviation values are reported in the Tables aside.

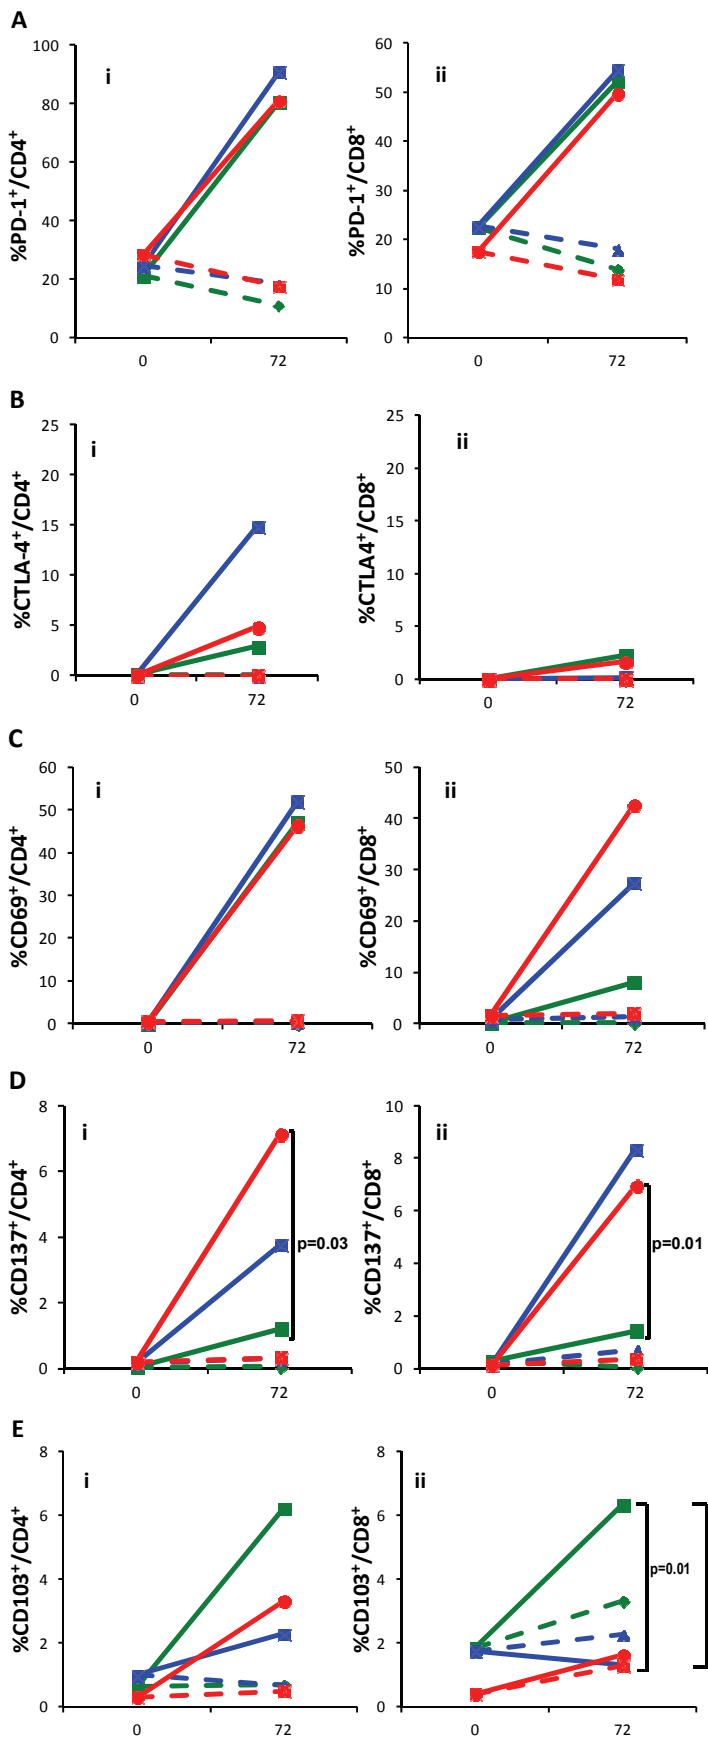

**A - i**

| PD-1 <sup>+</sup> /CD4 <sup>+</sup> | healthy |       | non-progressive |       | progressive |       |
|-------------------------------------|---------|-------|-----------------|-------|-------------|-------|
| timepoint                           | control | PHA   | control         | PHA   | control     | PHA   |
| 0 hrs                               | 5,32    | -     | 8,97            | -     | 12,60       | -     |
| 72 hrs                              | 3,36    | 24,81 | 13,04           | 14,11 | 12,01       | 12,71 |

**A - ii**

| PD-1 <sup>+</sup> /CD8 <sup>+</sup> | healthy |       | non-progressive |       | progressive |       |
|-------------------------------------|---------|-------|-----------------|-------|-------------|-------|
| timepoint                           | control | PHA   | control         | PHA   | control     | PHA   |
| 0 hrs                               | 7,39    | -     | 11,68           | -     | 11,85       | -     |
| 72 hrs                              | 4,03    | 19,90 | 8,61            | 16,50 | 10,15       | 14,88 |

**B - i**

| CTLA-4 <sup>+</sup> /CD4 <sup>+</sup> | healthy |      | non-progressive |       | progressive |      |
|---------------------------------------|---------|------|-----------------|-------|-------------|------|
| timepoint                             | control | PHA  | control         | PHA   | control     | PHA  |
| 0 hrs                                 | 0,21    | -    | 0,03            | -     | 0,42        | -    |
| 72 hrs                                | 1,07    | 6,86 | 0,84            | 20,15 | 0,21        | 6,76 |

**B - ii**

| CTLA-4 <sup>+</sup> /CD8 <sup>+</sup> | healthy |       | non-progressive |      | progressive |      |
|---------------------------------------|---------|-------|-----------------|------|-------------|------|
| timepoint                             | control | PHA   | control         | PHA  | control     | PHA  |
| 0 hrs                                 | 0,90    | -     | 0,04            | -    | 0,10        | -    |
| 72 hrs                                | 1,91    | 12,01 | 0,35            | 3,59 | 0,23        | 7,48 |

**C - i**

| CD69 <sup>+</sup> /CD4 <sup>+</sup> | healthy |       | non-progressive |       | progressive |       |
|-------------------------------------|---------|-------|-----------------|-------|-------------|-------|
| timepoint                           | control | PHA   | control         | PHA   | control     | PHA   |
| 0 hrs                               | 0,06    | -     | 0,45            | -     | 0,86        | -     |
| 72 hrs                              | 0,44    | 35,26 | 0,33            | 26,38 | 0,89        | 23,10 |

**C - ii**

| CD69 <sup>+</sup> /CD8 <sup>+</sup> | healthy |       | non-progressive |       | progressive |       |
|-------------------------------------|---------|-------|-----------------|-------|-------------|-------|
| timepoint                           | control | PHA   | control         | PHA   | control     | PHA   |
| 0 hrs                               | 0,18    | -     | 2,13            | -     | 2,35        | -     |
| 72 hrs                              | 1,14    | 28,24 | 1,87            | 25,75 | 3,77        | 22,76 |

**D - i**

| CD137 <sup>+</sup> /CD4 <sup>+</sup> | healthy |      | non-progressive |       | progressive |      |
|--------------------------------------|---------|------|-----------------|-------|-------------|------|
| timepoint                            | control | PHA  | control         | PHA   | control     | PHA  |
| 0 hrs                                | 0,05    | -    | 0,81            | -     | 0,85        | -    |
| 72 hrs                               | 0,08    | 3,20 | 0,44            | 10,92 | 0,24        | 7,73 |

**D - ii**

| CD137 <sup>+</sup> /CD8 <sup>+</sup> | healthy |      | non-progressive |      | progressive |       |
|--------------------------------------|---------|------|-----------------|------|-------------|-------|
| timepoint                            | control | PHA  | control         | PHA  | control     | PHA   |
| 0 hrs                                | 0,18    | -    | 0,19            | -    | 0,46        | -     |
| 72 hrs                               | 0,41    | 5,26 | 0,55            | 5,85 | 0,94        | 11,57 |

**E - i**

| CD103 <sup>+</sup> /CD4 <sup>+</sup> | healthy |       | non-progressive |       | progressive |      |
|--------------------------------------|---------|-------|-----------------|-------|-------------|------|
| timepoint                            | control | PHA   | control         | PHA   | control     | PHA  |
| 0 hrs                                | 0,12    | -     | 1,96            | -     | 0,42        | -    |
| 72 hrs                               | 0,31    | 12,94 | 0,40            | 16,41 | 0,82        | 5,02 |

**E - ii**

| CD103 <sup>+</sup> /CD8 <sup>+</sup> | healthy |      | non-progressive |      | progressive |      |
|--------------------------------------|---------|------|-----------------|------|-------------|------|
| timepoint                            | control | PHA  | control         | PHA  | control     | PHA  |
| 0 hrs                                | 0,47    | -    | 2,69            | -    | 3,50        | -    |
| 72 hrs                               | 1,21    | 3,58 | 2,85            | 3,75 | 5,87        | 1,50 |

**Supplementary Table 1. Absolute T cell counts in CLL patients compared to controls**

|                      |                   | Controls<br>(n=9)    | Non-progressive<br>(n=39) | Progressive<br>untreated<br>(n=22) | Progressive<br>treated<br>(n=19) |
|----------------------|-------------------|----------------------|---------------------------|------------------------------------|----------------------------------|
| CD3 <sup>+</sup> /μL | Median<br>(range) | 1340<br>(750 – 2360) | 2440*<br>(620 – 9200)     | 3135*<br>(530 – 14570)             | 3130**<br>(980 – 8380)           |
| CD4 <sup>+</sup> /μL | Median<br>(range) | 913<br>(462 – 1440)  | 1344<br>(340 – 3792)      | 1195<br>(290 – 7120)               | 1040<br>(410 – 3400)             |
| CD8 <sup>+</sup> /μL | Median<br>(range) | 380<br>(170 – 1070)  | 650<br>(60 – 5304)        | 1180<br>(90 – 6480)                | 1530***<br>(260 – 4650)          |

\*p<0.05, \*\* p<0.005, \*\*\* p<0.0005

**Supplementary Table 2. Median percentage values for each T cell subpopulation in CLL patients compared to controls**

|                                                         | Controls | Non-progressive | Progressive<br>untreated | Progressive<br>treated |
|---------------------------------------------------------|----------|-----------------|--------------------------|------------------------|
| % CD3 <sup>+</sup> / lymph                              | 74,6     | 8,6             | 2,6                      | 5,5                    |
| % CD4 <sup>+</sup> / lymph                              | 44,8     | 4,3             | 1,2                      | 1,6                    |
| % naive / CD4 <sup>+</sup>                              | 45,8     | 37,8            | 27,3                     | 4,6                    |
| % T <sub>CM</sub> / CD4 <sup>+</sup>                    | 18,8     | 27,8            | 24,6                     | 16,4                   |
| % T <sub>EM</sub> / CD4 <sup>+</sup>                    | 20,9     | 26,1            | 41,5                     | 69,5                   |
| % T <sub>EMRA</sub> / CD4 <sup>+</sup>                  | 7,4      | 4,8             | 5,2                      | 4,6                    |
| % CD8 <sup>+</sup> / lymph                              | 21,6     | 2,3             | 1,1                      | 2,8                    |
| % naive / CD8 <sup>+</sup>                              | 17,2     | 15,9            | 5,9                      | 1,8                    |
| % T <sub>CM</sub> / CD8 <sup>+</sup>                    | 3,5      | 2,3             | 1,4                      | 0,9                    |
| % T <sub>EM</sub> / CD8 <sup>+</sup>                    | 18,9     | 24,3            | 33,8                     | 26,5                   |
| % T <sub>EMRA</sub> / CD8 <sup>+</sup>                  | 54,5     | 60,1            | 49,7                     | 64,3                   |
| % PD-1 <sup>+</sup> / CD4 <sup>+</sup>                  | 21,1     | 24,0            | 34,3                     | 56,0                   |
| % naive / PD1 <sup>+</sup> CD4 <sup>+</sup>             | 4,4      | 4,3             | 3,5                      | 1,0                    |
| % T <sub>CM</sub> / PD1 <sup>+</sup> CD4 <sup>+</sup>   | 28,7     | 31,1            | 25,2                     | 12,9                   |
| % T <sub>EM</sub> / PD1 <sup>+</sup> CD4 <sup>+</sup>   | 61,3     | 53,7            | 62,7                     | 77,6                   |
| % T <sub>EMRA</sub> / PD1 <sup>+</sup> CD4 <sup>+</sup> | 6,2      | 6,4             | 6,3                      | 3,7                    |
| % PD-1 <sup>+</sup> / CD8 <sup>+</sup>                  | 33,0     | 24,8            | 35,7                     | 31,3                   |
| % naive / PD1 <sup>+</sup> CD8 <sup>+</sup>             | 3,5      | 3,0             | 1,9                      | 1,3                    |
| % T <sub>CM</sub> / PD1 <sup>+</sup> CD8 <sup>+</sup>   | 5,9      | 2,7             | 2,5                      | 1,2                    |
| % T <sub>EM</sub> / PD1 <sup>+</sup> CD8 <sup>+</sup>   | 48,4     | 42,8            | 56,2                     | 43,5                   |
| % T <sub>EMRA</sub> / PD1 <sup>+</sup> CD8 <sup>+</sup> | 40,2     | 52,5            | 38,4                     | 50,4                   |
| % i.c. CTLA-4 <sup>+</sup> / CD4 <sup>+</sup>           | 15,0     | 20,4            | 26,5                     | 30,3                   |
| % i.c. CTLA-4 <sup>+</sup> / CD8 <sup>+</sup>           | 1,8      | 2,9             | 3,8                      | 3,8                    |
| % CD69 <sup>+</sup> / CD4 <sup>+</sup>                  | 2,1      | 0,9             | 2,4                      | 2,1                    |
| % CD69 <sup>+</sup> / CD8 <sup>+</sup>                  | 5,4      | 1,9             | 3,4                      | 2,4                    |
| % Th1 / CD4 <sup>+</sup>                                | 15,0     | 24,7            | 41,9                     | 62,6                   |
| % Th2 / CD4 <sup>+</sup>                                | 58,9     | 47,7            | 33,8                     | 23,5                   |
| % Th17 / CD4 <sup>+</sup>                               | 14,5     | 11,3            | 9,7                      | 5,4                    |
| % Tregs / CD4 <sup>+</sup>                              | 4,0      | 4,8             | 3,8                      | 4,2                    |
| % Ki67 <sup>+</sup> CD4 <sup>+</sup>                    | 1,2      | 1,25            | 1,8                      | 3,7                    |
| % Ki67 <sup>+</sup> CD8 <sup>+</sup>                    | 0,9      | 1,30            | 1,6                      | 2,2                    |
