# Supplementary material for: T cells in chronic lymphocytic leukemia display dysregulated expression of immune checkpoints and activation markers
Source: PubMed Central journal article supplement — Haematologica. 2016 Dec 2;102(3):562–72. doi: 10.3324/haematol.2016.151100 (PMC5394965; doi:10.3324/haematol.2016.151100), 2017-03
Supplement: HAEMATOL-2016-151100v3-Palma_01-01.pdf [file HAEMATOL-2016-151100v3-Palma_01-01.pdf]

# T cells in chronic lymphocytic leukemia display dysregulated expression of immune checkpoints and activation markers

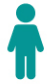

80

Patients with Chronic lymphocytic leukemia

vs

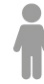

9

Healthy controls

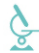

Analysis of T cell phenotype focusing on immune checkpoints and activation markers

## CLLT cells

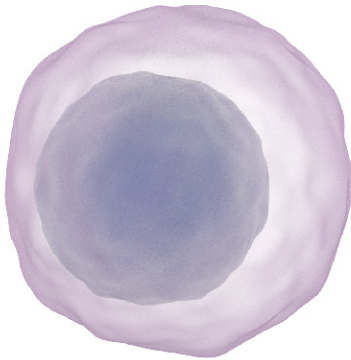

### Increased expression of immune checkpoints

- Higher numbers of CD4+ and CD8+ cells expressing PD-1
- Higher numbers of CD4+ and CD8+ cells with intracellular CTLA-4
- Higher numbers of Th1, Th2, Th17 and regulatory T cells

### Abnormal subset distribution

- Higher absolute numbers of CD3+ cells and the CD8+ subset was particularly expanded in previously treated patients
- Increase in antigen-experienced T cells both within the CD4+ and CD8+ subsets

### Higher proportion of proliferating cells

- High numbers of proliferating (Ki67+) and activated (CD69+) CD4+ and CD8+ cells
